# Supplementary material
Source: publisher site journal article supplement (https://www.dovepress.com/article/540574)
Supplement: Supplementary file 1 [file 540574%20Supplementary%20Material.docx]

Supplementary Table 1 Sores of disease activity index (DAI)

| **Feature** | **Score** | **Description** |
| --- | --- | --- |
| Body weight loss | 0 | 0% |
| 1 | 1-5% |
| 2 | 6-10% |
| 3 | 11-15% |
| 4 | >15% |
| Feces status | 0 | Normal |
| 2 | Loose stools |
| 4 | Watery stool |
| Occult/Bloody stools | 0 | Normal |
| 2 | Hemoccult positive |
| 4 | Hematochezia with nakedeyes |

Supplementary Table 2 Colon mucosa Damage Index (CMDI) score of colitis.

| Score | Description |
| --- | --- |
| 0 | free of damage |
| 1 | Congestion, no ulcer |
| 2 | Small ulcer, no obvious inflammation |
| 3 | Extensive ulcers, necrosis or adhesions |

Supplementary Table 3Histological scores of colitis.

| Score | Description |
| --- | --- |
| 0 | The crypt structure did not change |
| 1 | Chronic inflammatory infiltration (chronic inflammatory infiltration in the lamina propria) |
| 2 | Infiltration of neutrophils and eosinophils in lamina propria |
| 3 | Neutrophil infiltration was seen in the epithelium |
| 4 | Destruction of crypt structure |
| 5 | Erosion or ulcer |

Supplementary Table 4Immunohistochemical (IHC).

| Producer | Name | Article number | Dilution ratio |
| --- | --- | --- | --- |
| Proteintech | MPO Polyclonal antibody | 22225-1-AP | 1:100 |
| COX2/ Cyclooxygenase2/ PTGS2 Polyclonal antibody | 27308-1-AP | 1:100 |
| MUC2 Polyclonal antibody | 27675-1-AP | 1：2000 |
| ZO-1 Polyclonal antibody | 21773-1-AP | 1：1000 |
| Occludin Polyclonal antibody | 27260-1-AP | 1：2000 |
| Claudin 1 Polyclonal antibody | 28674-1-AP | 1：500 |

Supplementary Table 5Antibody information of Western Blot (WB).

| Producer | Name | Article number | Dilution ratio |
| --- | --- | --- | --- |
| Proteintech | ZO-1 Polyclonal antibody | 21773-1-AP | 1：1000 |
| Occludin Polyclonal antibody | 27260-1-AP | 1：2000 |
| Claudin 1 Polyclonal antibody | 28674-1-AP | 1：500 |
| TLR4 Polyclonal antibody | 19811-1-AP | 1：1000 |
| MyD88 Polyclonal antibody | 23230-1-AP | 1：5000 |
| NF-κB p65 Polyclonal antibody | 10745-1-AP | 1：2000 |
| Phospho-NF-κB p65 (Ser468) Recombinant antibody | 82335-1-RR | 1：2000 |
| Beta Actin Monoclonal antibody | 66009-1-Ig | 1：20000 |

Supplementary Table 6 Real-time Quantitative Polymerase Chain Reaction (RT-PCR) primer name and sequence.

| Primer name | Sequence (5' -> 3') |
| --- | --- |
| *TLR4-F* | TGAGGACTGGGTGAGAAATGAGC |
| *TLR4-R* | CTGCCATGTTTGAGCAATCTCAT |
| *MyD88-F* | TGACCCCACTCGCAGTTTGT |
| *MyD88-R* | TTTGTTTGTGGGACACTGCTTTC |
| *NF-κB p65-F* | GAGCAACTTGGAATCCCAGAAC |
| *NF-κB p65-R* | ACCGCCTCCTCTTCTTTATCCA |
| *GAPDH-F*  *GAPDH-R* | CCTCGTCCCGTAGACAAAATG  TGAGGTCAATGAAGGGGTCGT |
